# Supplementary material
Source: ML conference proceedings conference paper supplement (https://openaccess.thecvf.com/content/CVPR2026/html/Sun_GeoTikzBridge_Advancing_Multimodal_CVPR_2026_paper.html)
Supplement: Supplementary file 1 [file Sun_GeoTikzBridge_Advancing_Multimodal_CVPR_2026_supplemental.pdf]

# GeoTikzBridge: Advancing Multimodal Code Generation for Geometric Perception and Reasoning

## Supplementary Material

001 This supplementary material complements the main text:  
002 Firstly, Sec. A specifies seven benchmarks (five open-  
003 sourced, two in-house constructed) for geometric percep-  
004 tion and reasoning, along with seven metrics: CLIP Score,  
005 FID, and Compilation Success Rate (CSR) for image-to-  
006 tikz generation; MSE, SSIM, PSNR for fine-grained aux-  
007 iliary line addition; and Final Answer Accuracy (top-1 ac-  
008 curacy) for downstream reasoning. Secondly, Sec. B cov-  
009 ers compilation details, including a post-processing work-  
010 flow for syntax and logical errors and LaTeX compilation-  
011 rendering process. Thirdly, Sec. C provides Doubao prompt  
012 for filtering unreliable instruction annotations in construct-  
013 ing the GeoTikz-Instruct dataset. Then, Sec. D describes  
014 the image transformation strategy to enrich training image  
015 diversity. Next, Sec. E presents ablation studies analyz-  
016 ing impacts of maximum self-refinement iteration number  
017  $K$  and the threshold  $\tau$  in reliable code selection. Then,  
018 we provide failure analysis in Sec. F and analyze the  
019 model-agnostic effectiveness of our approach in Sec. G,  
020 respectively. Next, we supple quantitative comparison results  
021 with latest closed-source models in Sec. H. Finally, Sec. I  
022 provides supplementary visualization results, including ad-  
023 ditional examples of image-to-tikz generation, instruction-  
024 driven auxiliary line generation, as well as tikz assistant and  
025 auxiliary line assistant reasoning.

## 026 A. Benchmark & Metric Details

### 027 A.1. Benchmark Details

028 five open-sourced benchmarks (i.e., DaTikZ, MathVista-  
029 GPS, GAOKAO-MM-Math, RBench, and RBench-V) and  
030 two in-house constructed benchmarks named EDUBench-  
031 mark and the constructed GeoTikz-Instruct are used for  
032 evaluation, most of which are focused on geometric mathe-  
033 matical reasoning.

- 034 • *DaTikZ* is a large-scale image-tikz benchmark (360k+  
035 graphics) for scientific diagram analysis, which requires  
036 LaTeX code parsing and text-graphics mapping. The  
037 GeoTikzBridge-Base results are reported on its test set,  
038 which contains 542 graphic images.
- 039 • *MathVista-GPS* focuses on visual-geometric reasoning,  
040 which is a subset of MathVista benchmark. It con-  
041 tains 208 samples covering 2D/3D geometry and dynamic  
042 transformations. It includes diverse visual contexts, such  
043 as natural images, geometric diagrams, abstract scenarios,  
044 synthetic scenes, and various charts and figures.
- 045 • *GAOKAO-MM-Math* is a subset of GAOKAO-MM with

80 questions that focus on mathematical reasoning and 046  
is a Gaokao-based benchmark. The GeoTikzBridge-Base 047  
results are reported on its 142 images. 048

- *RBench* is a graduate-level multi-disciplinary benchmark 049  
designed to evaluate the complex reasoning capabilities 050  
of MLLMs/LLMs, spanning 19 departments (e.g., math- 051  
ematics, physics, biology) and over 100 subjects. It sup- 052  
ports both English and Chinese, with 665 multimodal- 053  
specific questions integrating text and visual modals. We 054  
adopt its “Multimodal English (en)” subset (665 samples) 055  
for experiments. 056
- *RBench-V* is a vision-indispensable reasoning benchmark 057  
covering 4 core categories: math, physics, counting, and 058  
game. It contains 803 multimodal questions. In our work, 059  
we focus on two categories: the “Overall” category (to- 060  
tally 803 samples) for general reasoning, and the “Math” 061  
category (176 samples) for geometric reasoning. 062
- *EDUBenchmark* is an in-house constructed benchmark 063  
for multi-disciplinary reasoning. It contains 373 graphic 064  
images covering multiple disciplines (such as math, 065  
physics, chemistry, etc.) across age groups corresponding 066  
to primary school, junior high school, senior high school, 067  
university, and vocational exams, ensuring comprehen- 068  
sive coverage of multimodal mathematical reasoning scen- 069  
arios. 070
- *GeoTikz-Instruct* is an in-house constructed benchmark 071  
for adding auxiliary lines in geometric figures, as men- 072  
tioned before. It consists of 419k training samples and 073  
789 testing samples. 074

### 075 A.2. Evaluation Metric Details

The image-to-tikz task focuses on generating valid tikz 076  
codes from geometric figures, so we adopt two metrics to 077  
measure both graphical consistency and code functionality: 078

- *CLIP Score*: We use the CLIP model with ViT- 079  
L/14@224px as vision encoder to quantify semantic con- 080  
sistency between the image that rendered from the gen- 081  
erated tikz code and the original image. CLIP score is 082  
calculated as the cosine similarity between the two image 083  
embeddings. 084
- *FID*: Fréchet Inception Distance (FID) is also utilized for 085  
generated tikz quality evaluation. ViT-L/14@224px is re- 086  
employed to extract features from rendered and original 087  
images. FID computes the mean and covariance of the 088  
two feature distributions, and calculates the Fréchet dis- 089  
tance between the corresponding multivariate Gaussians. 090  
Smaller values indicate higher distribution similarity and 091

092 better generation quality.  
093 • *Compilation Success Rate*: We evaluate the functional  
094 correctness of the generated tikz code by compiling and  
095 rendering. The metric is defined as the percentage of code  
096 samples that successfully compile without errors and pro-  
097 duce non-blank images.

098 Compared with geometric tikz code generation, the aux-  
099 iliary line addition task is a more fine-grained task, as it  
100 requires precise localization of geometric primitives (e.g.,  
101 vertices, line segments) and the generation of logically con-  
102 sistent auxiliary structures to connect known conditions,  
103 rather than merely reproducing the overall graphical layout.  
104 Hence, besides CLIP score and compilation success rate,  
105 we also adopt three fine-grained metrics to assess the simi-  
106 larity between each rendered image from the generated tikz  
107 and the corresponding ground-truth image in the test set:

- 108 • *MSE*: Mean Square Error (MSE) is a fundamental met-  
109 ric for quantifying pixel-wise differences between im-  
110 ages rendered from generated tikz codes and ground-truth  
111 images. It is calculated as the average of squared er-  
112 rors between corresponding pixels of the two images.  
113 Lower MSE values indicate smaller pixel-level discrep-  
114 ancies and higher rendering fidelity.
- 115 • *SSIM*: Structural Similarity Index (SSIM) aligns with  
116 human visual perception by incorporating three key  
117 attributes of images: luminance, contrast, and local  
118 structure. It computes similarity between images ren-  
119 dered from generated tikz codes and ground-truth im-  
120 ages through sliding window-based regional pixel anal-  
121 ysis, with value ranging from 0 to 1. Values closer to 1  
122 indicate greater structural and visual consistency between  
123 the two images.
- 124 • *PSNR*: Peak Signal to Noise Ratio (PSNR) is derived  
125 from MSE and measured in decibels (dB) to evaluate im-  
126 age quality by quantifying the ratio between signal peak  
127 amplitude and noise. It compares images rendered from  
128 generated tikz codes against ground-truth images, with  
129 higher PSNR values corresponding to less distortion.

130 In downstream mathematical reasoning task, *Final Answer*  
131 *Accuracy* is adopted, which is defined as the correctness of  
132 the generated final solution.

## 133 B. Compilation Details

134 **Code Post-processing.** Given that tikz codes predicted  
135 by the model are prone to format non-compliance, lead-  
136 ing to compilation failures, a code post-processing strategy  
137 is implemented to fix common compilation errors. This  
138 integrated workflow combines syntax correction and logi-  
139 cal optimization, mainly addressing unclosed environments  
140 and redundancy issues which not only enhances code com-  
141 pileability, but also improves the compactness and readabil-

ity of the codes. Notably, the reported experimental results  
have employed the same post-processing operations for all  
models, including our proposed models and the compared  
models. The post-processing procedure is as follows:

- 1) *Package Deduplication*: For duplicate ‘\usepackage’  
declarations, retain one instance per unique package  
while preserving all non-redundant statements.
- 2) *Block-Aware Deduplication*: Parse and identify nested  
environments (e.g., ‘tikzpicture’, ‘scope’) with priority  
to innermost environments as well as ‘\foreach’ code  
blocks. Within each identified block, remove redundant  
identical non-environment start/end lines, avoiding re-  
dundant code execution while maintaining structural in-  
tegrity.
- 3) *Truncated Line Removal*: Detect syntactically incom-  
plete lines, defined as lines with unclosed LaTeX com-  
mands (excluding environment directives) lacking ter-  
minating semicolons, or imbalanced curly braces/square  
brackets, and discard only the last non-symbol-only  
line (if incomplete) before the main environment end  
‘\end{tikzpicture}’.
- 4) *Environment Balance*: Adopt stack-based nesting track-  
ing to manage nested environments. Append missing en-  
vironment end directives in reverse order of their open-  
ing (e.g., close ‘scope’ before ‘tikzpicture’ for nested  
structures).
- 5) *Document Structure Optimization*: Ensure the  
‘document’ environment is fully defined with ex-  
actly one pair of start (‘\begin{document}’) and  
end (‘\end{document}’) directives, appending  
‘\end{document}’ at the end (after removing trail-  
ing blank lines) if absent. Relocate any graphical  
environments (e.g., ‘tikzpicture’) erroneously placed  
outside the ‘document’ scope into it for syntactic  
validity.
- 6) *Logical Refinement*: Extract redundant graphical com-  
mands (e.g., ‘\draw’, ‘\node’) from ‘\foreach’ blocks  
that do not reference the loop variable (e.g., ‘\x’, ‘\y’),  
relocating them outside the loop to avoid redundant ex-  
ecution. Besides, move commands misplaced outside  
their semantically required environments (e.g., ‘\draw’  
outside ‘tikzpicture’) to the correct scope.

After post-processing, the Compilation Success Rate (CSR)  
metrics of generated codes reflect the intrinsic code gen-  
eration quality and syntax adaptation potential of different  
methods, highlighting inherent model capability in terms of  
code syntax correctness, structural rationality, and format  
compliance, eliminating interference from non-essential  
factors such as sequence disorder and redundant repetition.

**Compiling and Rendering.** Each post-processed tikz code  
snippet is embedded within a LaTeX code framework to en-  
able standardized rendering of its defined geometric con-

194 tent. We also include the necessary language packages  
 195 at the beginning of the LaTeX file to ensure that the text  
 196 content in the corresponding languages can be displayed  
 197 successfully in the compiled PDF. Besides, we set the  
 198 LaTeX file type to ‘standalone’ to facilitate subsequent  
 199 compiling and rendering into images. Then, the latex  
 200 codes are compiled into PDFs, which are subsequently con-  
 201 verted to Portable Network Graphics (PNG) images via the  
 202 pdf2Image library.

## 203 C. Doubao Prompt for Filtering Unreliable In- 204 struction Annotations

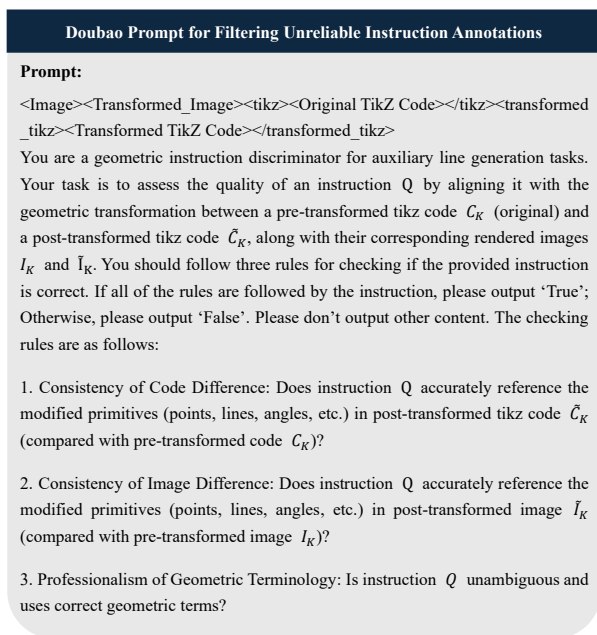

Figure S1. Prompt input to Doubao for filtering unreliable instruction annotations in the GeoTikz-Instruct dataset construction.

205 To filter out low-quality GeoTikz-Instruct instructions an-  
 206 notated by Qwen2.5-VL-72B while ensuring geometric va-  
 207 lidity, we adopt a prompt-guided discriminative strategy us-  
 208 ing Doubao. Specifically, a targeted prompt is first de-  
 209 signed for guiding Doubao to score the raw annotated in-  
 210 structions based on geometric consistency, as shown in Fig.  
 211 S1. Then, high-quality outputs are selected to form the final  
 212 instruction-image-tikz triples.

## 213 D. Image Transformation Details

214 As a key component of the localized geometric transfor-  
 215 mation strategy (introduced in Sec. 3.2 of the main text),  
 216 image transformation complements code transformation to  
 217 address the model’s insensitivity to fine-grained geomet-  
 218 ric details. While code transformation enhances structural  
 219 semantics via localized editing, fine-grained visual varia-

tions (e.g., slight rotations, scale adjustments) in geometric  
 220 scenes still need handling. The core goal of image transfor-  
 221 mation is to enrich the visual diversity of training samples in  
 222 images while preserving invariant geometric relationships  
 223 in codes, forcing the model to focus on essential geometric  
 224 properties rather than superficial visual features. The image  
 225 transformation procedure is as follows: 226

- 1) *Canvas Expansion*: A 100-pixel replication border is ap-  
 227 pended around the original image to form an expanded  
 228 canvas, which reserves sufficient edge space to prevent  
 229 content truncation induced by subsequent perspective  
 230 transformation. 231
- 2) *Perspective Transformation*: Source points are defined  
 232 as the four corners of the original image on the expanded  
 233 canvas, with target points generated through random off-  
 234 sets (ranging from -50 to 50 pixels, equivalent to half the  
 235 border size). A perspective transformation matrix is es-  
 236 timated based on source-target correspondences and ap-  
 237 plied to the canvas to introduce subtle distortion  
 238 that simulates natural viewing angle variations. 239
- 3) *Optimized Cropping*: The transformed image is con-  
 240 verted to gray-scale, binarized, and processed using  
 241 morphological closing with a  $15 \times 15$  kernel to fill holes  
 242 in the foreground region. The maximum external con-  
 243 tour is selected to compute the minimum enclosing rect-  
 244 angle, and the cropping boundary is expanded by 5 pix-  
 245 els. To preserve key content, the cropped region is con-  
 246 strained to be at least 50% of the original image size.  
 247 Subsequently, the cropped image is resized to the origi-  
 248 nal dimensions using area interpolation to ensure sharp  
 249 down-sampling. 250
- 4) *Illumination Enhancement*: Random non-uniform illu-  
 251 mination gradients are introduced, including horizontal  
 252 (with brightness linearly transitioning from 0.4 to 0.6  
 253 on the left to 0.8 to 1.0 on the right), vertical (with  
 254 brightness linearly transitioning from 0.4 to 0.6 at the  
 255 top to 0.8 to 1.0 at the bottom), and central (with bright-  
 256 ness decaying from the center to the edges). The cen-  
 257 tral gradient follows  $\text{gradient}(x, y) = \text{base\_brightness} +$   
 258  $\text{brightness\_range} \times (1 - \frac{\text{dist}}{\text{max\_dist}})$ , where  $\text{base\_brightness}$   
 259 ranges from 0.6 to 0.7,  $\text{brightness\_range}$  ranges from 0.2  
 260 to 0.3,  $\text{dist}$  denotes the distance from a pixel to the cen-  
 261 ter, and  $\text{max\_dist}$  is the maximum diagonal distance from  
 262 the center. The gradient matrix is multiplied with the  
 263 image, and the resulting pixel values are clipped to the  
 264 range  $[0, 255]$ . 265
- 5) *Blur Augmentation*: Gaussian blur is applied with a 50%  
 266 probability, using a radius ranging from 0.5 to 1.2 to sim-  
 267 ulate mild lens defocus. 268
- 6) *Color Adjustment*: Contrast (with a factor ranging from  
 269 0.7 to 0.8) and saturation (with a factor ranging from 0.7  
 270 to 0.85) are moderately reduced to mimic natural color  
 271 attenuation. 272

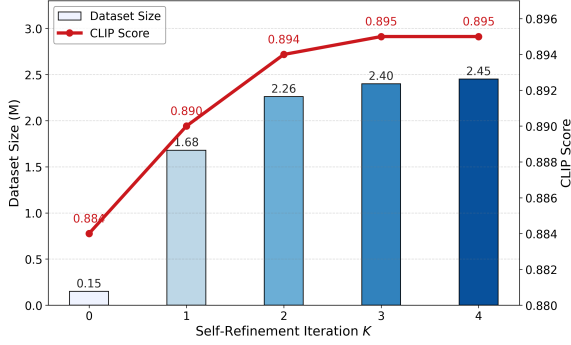

Figure S2. Ablation study of different values of self-refinement  $K$  for GeoTikzBridge-Base-8B, evaluated on the MathVista-GPS benchmark.

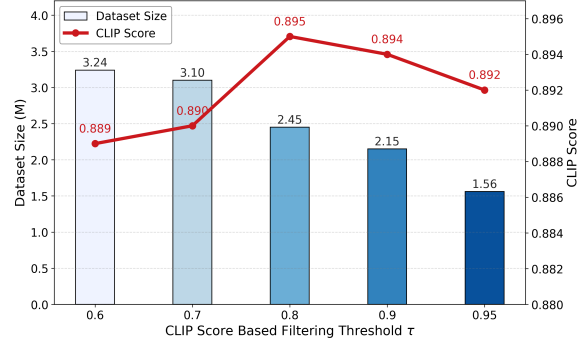

Figure S3. Ablation study of different values of CLIP score based filtering threshold  $\tau$  for GeoTikzBridge-Base-8B, evaluated on the MathVista-GPS benchmark.

- 273 7) *Lens Distortion*: Subtle radial distortion is introduced, 308  
 274 with distortion coefficients  $k_1$  in the range  $[-0.03, 0.03]$  309  
 275 and  $k_2$  in  $[-0.01, 0.01]$ . Image coordinates are 310  
 276 normalized to the range  $[-1, 1]$ , and the radial distance 311  
 277 is computed as  $r = x_{\text{norm}}^2 + y_{\text{norm}}^2$ . Distorted coordinates 312  
 278 are derived as  $x' = x_{\text{norm}} \times (1 + k_1 r + k_2 r^2)$  and 313  
 279  $y' = y_{\text{norm}} \times (1 + k_1 r + k_2 r^2)$ , which are then remapped 314  
 280 to the original image size. 315  
 281 8) *Rotation Augmentation*: Minor in-plane rotation (within 316  
 282 the range  $[-1.5^\circ, 1.5^\circ]$ ) is applied around the image center, 317  
 283 with a replication border mode used to handle edge 318  
 284 pixels. 319

## 285 E. Supplementary Ablations

286 **Self-Refinement Iteration  $K$ .** We evaluate the effect of 320  
 287 iterative self-refinement on the image-to-tikz performance 321  
 288 of GeoTikzBridge-Base-8B and the scalability of its training 322  
 289 dataset, Fig. S2 presents the corresponding ablation 323  
 290 study. Evaluated on the MathVista-GPS benchmark, the figure 324  
 291 uses bars to represent training dataset size and lines to 325  
 292 denote CLIP score.

293  $K = 0$  corresponds to the initial state where the pre- 326  
 294 trained FigCodifier (denoted as  $M_0$ ) utilizes the 145k- 327  
 295 sample DaTikZ seed dataset. This model achieves a CLIP 328  
 296 score of 0.884 on geometric perception, as it has not been 329  
 297 trained on geometric-specific dataset. At  $K = 1$ ,  $M_0$  is 330  
 298 employed to predict tikz codes for candidate geometric images 331  
 299 sourced from nine public datasets. The limited ability of  $M_0$  332  
 300 to parse fine-grained details (e.g., segment relations, angles) 333  
 301 results in relatively few reliable samples that are filtered 334  
 302 via the CLIP threshold of 0.8 (detailed in Sec. 3.2 of the 335  
 303 main text). With this expanded dataset, the model trained 336  
 304 on it (denoted as  $M_1$ ) outperforms  $M_0$  in CLIP score, as 337  
 305 the added geometric-specific training samples enhance basic 338  
 306 geometric perception of the model. 339

307 For  $K = 2$ , the improved geometric image-to-tikz ability 340

of  $M_1$  increases the number of reliable samples (including 308  
 self-refined and transformation-augmented ones), driving 309  
 a significant CLIP score gain for the subsequent model 310  
 (denoted as  $M_2$ ). At  $K = 3$ , dataset growth slows: 311  
 Despite sampling with replacement from the candidate geo- 312  
 metric image pool, the model already achieves relatively 313  
 mature geometric image-to-tikz capability, so the gain from 314  
 newly added reliable samples in driving performance im- 315  
 provement diminishes. When  $K = 4$ , dataset expansion 316  
 diminishes further and the CLIP score of the model nearly 317  
 converges. Hence, we set  $K = 4$  as the maximum iter- 318  
 ation number for the experiments, balancing training cost 319  
 and performance. 320

**CLIP Score Based Filtering Threshold  $\tau$ .** We evaluate 321  
 the effect of the CLIP score-based filtering threshold  $\tau$  on 322  
 both dataset scalability and model performance, Fig. S3 323  
 presents the corresponding ablation study evaluated on the 324  
 MathVista-GPS benchmark. 325

For  $\tau = 0.6$ , the dataset size reaches 3.24M (the largest 326  
 across all thresholds), while the CLIP score is 0.889. 327  
 This indicates loose filtering introduces massive low-quality 328  
 samples, limiting performance. At  $\tau = 0.7$ , the dataset size 329  
 decreases slightly to 3.10M, and the CLIP score increases 330  
 to 0.890. When  $\tau = 0.8$ , the dataset size decreases to 331  
 2.45M, yet the CLIP score peaks at 0.895, achieving the 332  
 optimal trade-off between dataset scale and sample quality, 333  
 where sufficient samples enable effective training, and high- 334  
 quality samples drive the best performance. For  $\tau = 0.9$  335  
 and  $\tau = 0.95$ , the dataset size further reduces to 2.15M and 336  
 1.56M, respectively, and the CLIP score decreases to 0.894 337  
 and 0.892, as insufficient training dataset restricts perfor- 338  
 mance. Nevertheless, the CLIP scores achieved with the 339  
 2.15M and 1.56M datasets (at  $\tau = 0.9$  and  $\tau = 0.95$ ) re- 340  
 main higher than those obtained with the larger 3.24M and 341  
 3.10M datasets (at  $\tau = 0.6$  and  $\tau = 0.7$ ), indicating that 342  
 the quality of training data is more critical than its quan- 343

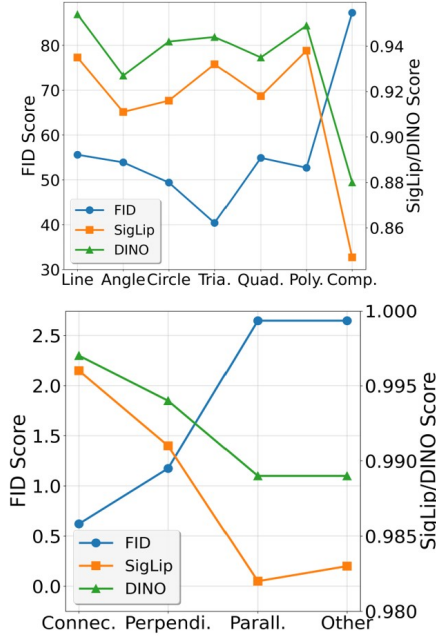

Figure S4. FID, SigLip/DINO scores of Base-8B model (up) and Instruct-8B model (bottom) across different geometric structures.

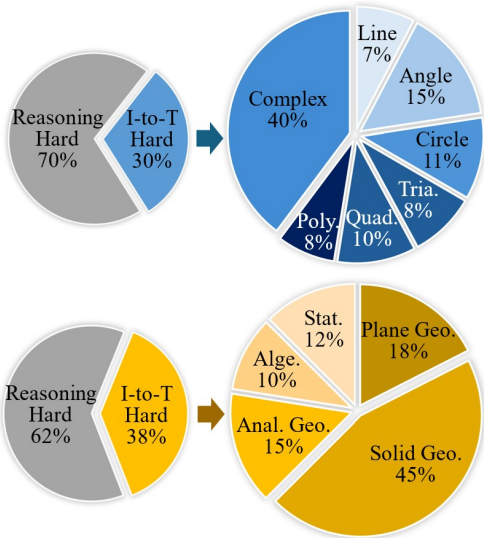

Figure S5. Average failure rate distributions of InternVL3.5-38B+GeoTikzBridge-Base-8B across different geometric structures (up) and mathematical domains (bottom).

344 tity for this task. Hence, we set  $\tau = 0.8$  as the CLIP score  
 345 based filtering threshold, balancing dataset size and sample  
 346 quality.

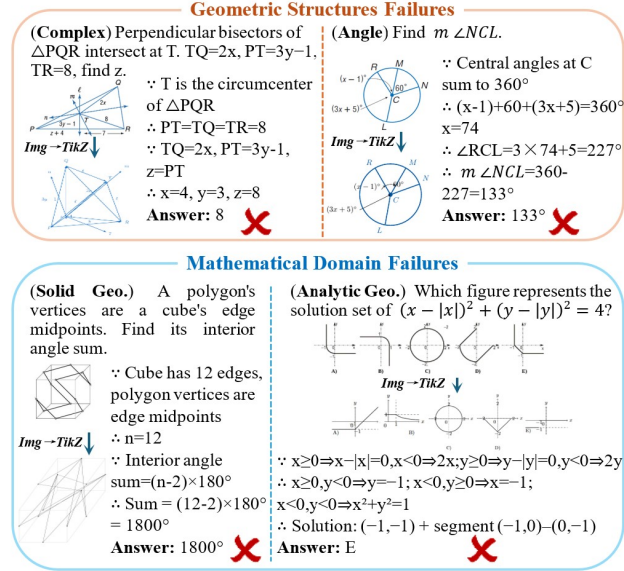

Figure S6. Failure cases of InternVL3.5-38B with tikz code input.

## F. Failure Analysis

We analyze the failure cases of our proposed models on both geometric structure understanding and mathematical reasoning tasks. We first evaluate the GeoTikzBridge-Base-8B and GeoTikzBridge-Instruct-8B models across various geometric structures on the MathVista-GPS and GeoTikz-Instruct test sets, with results shown in Fig. S4. As shown from this figure, the GeoTikzBridge-Base-8B model suffers consistent performance degradation on complex figures, as overlong code tokens were truncated during training. The GeoTikzBridge-Instruct-8B model slightly underperforms on parallel line drawing tasks, due to the strict directional consistency constraint that raises higher requirements for generation precision.

Furthermore, we analyze problem-solving failure cases across geometric structures and mathematical domains, as shown in Fig. S5. I-to-T hard cases denote failure cases with an average score  $\leq 0.9$  across CLIP, SigLip and DINO metrics. The rest are reasoning hard cases. As shown from this figure, InternVL3.5-38B (with tikz code input) underperforms on tasks involving complex/angular geometric structures and solid/analytic geometry problems (examples in Fig. S6). These limitations stem from task difficulty, which we will address by developing an end-to-end reasoning paradigm in future work.

## G. Metric Model-Agnostic Effectiveness

Though we use the CLIP model for evaluation, the performance gains of our models do not depend on any specific metric model. We provide additional SigLip

Table S1. Performance comparison of instructed code generation methods across CLIP, SigLip, and DINO model metrics.

| Method           | CLIP         | SigLip       | DINO         |
|------------------|--------------|--------------|--------------|
| FigCodifier      | 0.936        | 0.940        | 0.957        |
| ours-Base-8B     | 0.967        | 0.970        | 0.978        |
| ours-Instruct-8B | <b>0.992</b> | <b>0.992</b> | <b>0.995</b> |

Table S2. Performance comparison of image-to-tikz methods across CLIP, SigLip, and DINO model metrics.

| Method          | DaTikZ       |              |              | MathVista-GPS |              |              |
|-----------------|--------------|--------------|--------------|---------------|--------------|--------------|
|                 | CLIP         | SigLip       | DINO         | CLIP          | SigLip       | DINO         |
| Qwen2.5-VL-72B  | 0.795        | 0.803        | 0.832        | 0.858         | 0.880        | 0.911        |
| Qwen3-VL-30B    | 0.672        | 0.696        | 0.758        | 0.802         | 0.839        | 0.893        |
| InternVL3.5-38B | 0.733        | 0.752        | 0.786        | 0.786         | 0.793        | 0.855        |
| GLM4.5V-106B    | <u>0.806</u> | <u>0.812</u> | <u>0.834</u> | 0.769         | 0.773        | 0.838        |
| FigCodifier     | 0.785        | 0.791        | 0.819        | 0.884         | 0.906        | 0.922        |
| ours-Base-8B    | 0.804        | 0.808        | 0.832        | <u>0.895</u>  | <u>0.919</u> | <u>0.937</u> |
| ours-Base-38B   | <b>0.813</b> | <b>0.819</b> | <b>0.875</b> | <b>0.915</b>  | <b>0.941</b> | <b>0.947</b> |

Table S3. Performance comparison of image-to-tikz methods with GPT-5.0 on the MathVista-GPS benchmark across five metrics.

| Method       | FID↓        | CSR↑         | CLIP↑        | SigLip↑      | DINO↑        |
|--------------|-------------|--------------|--------------|--------------|--------------|
| GPT-5.0      | 44.8        | 96.9%        | 0.880        | 0.903        | 0.921        |
| ours-Base-8B | <b>36.0</b> | <b>97.1%</b> | <b>0.895</b> | <b>0.919</b> | <b>0.937</b> |

376 and DINO evaluation results in Tables S1 and S2. As  
 377 shown in these two tables, our GeoTikzBridge-Base-8B  
 378 and GeoTikzBridge-Instruct-8B models consistently out-  
 379 perform the FigCodifier baseline across CLIP, SigLip and  
 380 DINO metrics. They also maintain significant advantages  
 381 over state-of-the-art baselines including Qwen2.5VL-72B  
 382 and InternVL3.5-38B. These results demonstrate the met-  
 383 ric model-agnostic effectiveness of our approach.

## 384 H. Comparison vs. Latest Closed-Source Mod- 385 els.

386 We compare the image-to-tikz performance of our  
 387 GeoTikzBridge-Base-8B model with GPT-5.0 on the  
 388 MathVista-GPS benchmark, with results reported in Table  
 389 S3. As seen from this table, our model outperforms GPT-  
 390 5.0 across all image-to-tikz metrics. Furthermore, we also  
 391 provide the tikz codes generated by GeoTikzBridge-Base-  
 392 8B to latest closed-source models for mathematical reason-  
 393 ing. The results on MathVista-GPS benchmark reported in  
 394 Table S4 demonstrates that applying our approach to closed  
 395 models also yields improvements.

Table S4. Mathematical reasoning performance of latest closed-source models on the MathVista-GPS benchmark. Scores are reported as original model / model + GeoTikzBridge-Base-8B.

| Method            | Accuracy (Base/+Ours) |
|-------------------|-----------------------|
| GPT-5.0           | 0.891/ <b>0.937</b>   |
| Claude-4.5-Sonnet | 0.774/ <b>0.846</b>   |
| Gemini-3-Pro      | 0.779/ <b>0.923</b>   |

## I. Supplementary Visualization

396 To supplement the results partially presented in the main  
 397 text, we provide additional examples for the image-to-tikz  
 398 task and the instruction-based image-to-tikz task in Fig. S7  
 399 and Fig. S8, respectively. As shown in Fig. S7, our model  
 400 still maintains precise capture of key geometric components  
 401 (line segments, angles, closed polygons, and semantic la-  
 402 bels) in these additional examples. Fig. S8 further veri-  
 403 fies that our model generates auxiliary lines more compliant  
 404 with given instructions while preserving the characteristics  
 405 of the original geometric figures.  
 406

407 As a complement to the quantitative results of both tikz as-  
 408 sistant problem-solving task (Example I in Fig. S9 and Ex-  
 409 ample II in Fig. S10) and auxiliary line assistant problem-  
 410 solving task (Example III in Fig. S11 and Fig. S12, as  
 411 well as Example IV in Fig. S13 and Fig. S14) presented  
 412 in Table 2 and Table 4 of the main text (Sec. 4.2), we  
 413 provide four representative qualitative examples. Consistent  
 414 with the main text’s evaluation setup: For the first two  
 415 examples, InternVL3.5-38B is used for geometric reason-  
 416 ing; For the last two examples, InternVL3.5-38B first pre-  
 417 dict auxiliary line instructions for original geometric prob-  
 418 lems, these instructions and raw images are then fed into our  
 419 instruction-based model GeoTikzBridge-Instruct to gener-  
 420 ate tikz codes with auxiliary lines added, and the generated  
 421 tikz codes and/or their rendered images are finally input to  
 422 InternVL3.5-38B for geometric reasoning.

423 Notably, the examples align with key observations from Ta-  
 424 ble 2 and Table 4: Examples I and II demonstrate that the  
 425 model corrects its image perception errors after incorpo-  
 426 rating tikz codes; Example III yields an incorrect solution  
 427 without auxiliary lines but correct ones with either aug-  
 428 mented image or tikz code, demonstrating that introducing  
 429 auxiliary lines, either in the form of augmented images or  
 430 augmented images combined with tikz codes, benefit geo-  
 431 metric problem solving; Example IV fails in both models  
 432 “W/O Auxiliary Lines” and “With Auxiliary Line Image”,  
 433 with only “With Both Auxiliary Line Image And Tikz”  
 434 leading to a correct solution, further demonstrating that tikz  
 435 codes outperforms augmented images in facilitating precise  
 436 geometric reasoning.

| Raw Image | Tikz-Rendered Image |
|-----------|---------------------|-----------|---------------------|-----------|---------------------|-----------|---------------------|
|           |                     |           |                     |           |                     |           |                     |
|           |                     |           |                     |           |                     |           |                     |
|           |                     |           |                     |           |                     |           |                     |
|           |                     |           |                     |           |                     |           |                     |
|           |                     |           |                     |           |                     |           |                     |
|           |                     |           |                     |           |                     |           |                     |
|           |                     |           |                     |           |                     |           |                     |
|           |                     |           |                     |           |                     |           |                     |
|           |                     |           |                     |           |                     |           |                     |

Figure S7. Visualization results of tikz codes generated by GeoTikzBridge-Base, consisting of input images (either geometric or non-geometric) and the corresponding figures rendered from our predicted tikz codes.

| Connection of Two Points |                                                                     | Drawing a Perpendicular Line |                                                                              | Drawing a Parallel Line |                                                                   | Other Types of Auxiliary Lines |                                                                                          |
|--------------------------|---------------------------------------------------------------------|------------------------------|------------------------------------------------------------------------------|-------------------------|-------------------------------------------------------------------|--------------------------------|------------------------------------------------------------------------------------------|
| Raw Image                | Image With Auxiliary Lines Added                                    | Raw Image                    | Image With Auxiliary Lines Added                                             | Raw Image               | Image With Auxiliary Lines Added                                  | Raw Image                      | Image With Auxiliary Lines Added                                                         |
|                          | Connect AD                                                          |                              | Draw a perpendicular line to CD through point E                              |                         | Draw a line parallel to BC through point A                        |                                | Draw the radius of circle                                                                |
|                          | Connect BO                                                          |                              | Draw a perpendicular line to BC through point E                              |                         | Draw a line parallel to AC through point B                        |                                | In the top view, draw the horizontal and vertical diameters of the circle.               |
|                          | Connect AD                                                          |                              | Draw a perpendicular line to AC through point B                              |                         | Draw a line parallel to BC through point E                        |                                | Draw the altitude of triangle ABC through point A                                        |
|                          | Connect points D and F                                              |                              | Add an altitude perpendicular to the base in Figure (2)                      |                         | Draw a line parallel to AD through point E, intersecting BC at H. |                                | Draw the diameter on the base of Cylinder I                                              |
|                          | Connect points A and E                                              |                              | Add a horizontal line perpendicular to this line on the middle vertical line |                         | Extend the line parallel to AD through point O                    |                                | Draw an incircle inside the square                                                       |
|                          | Connect the center of the circle to the four vertices of the square |                              | Draw a straight line perpendicular to the x-axis at x=3                      |                         | Extend the line parallel to DF through point E                    |                                | Connect the lower-left corner of the square figure in Figure 2 to its upper-right corner |
|                          | Connect the center of the circle to point D                         |                              | Draw a straight line perpendicular to the horizontal axis at x=5             |                         | Draw a line parallel to the y-axis through point (2, 0)           |                                | Mark an arbitrary point on the x-axis and connect it to an arbitrary point on the y-axis |

Figure S8. Visualization results of instruction-driven auxiliary line generation, including the input geometric images, the natural language instructions for auxiliary line addition, and the rendered figures from the generated tikz codes.

### Problem Solving Example I: Tikz Code Improves Angle Calculation Reasoning

**Question:** As shown in the figure,  $\angle BAC = 110^\circ$ , if A and B are symmetrical with respect to the line MP, A and C are symmetrical with respect to the line NQ, then the size of  $\angle PAQ$  is ( )

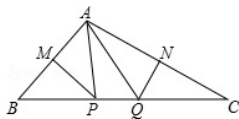

**GT Answer:**  $40^\circ$

#### Tikz Generation by GeoTikzBridge-Base

**Prompt:**

Please generate the corresponding TikZ code that accurately represents the visual elements in the image. TikZ is a powerful tool for creating vector graphics within LaTeX documents. Your generated code should be precise, well-structured, and should recreate the image as faithfully as possible.

**Response:**

```
\documentclass[11pt]{standalone}
\usepackage[UTF8]{ctex}
\usepackage{amsmath,amssymb,amsthm}
\usepackage{tikz}
\usetikzlibrary{calc}
\usepackage{color}
\begin{document}
\begin{tikzpicture}[scale=0.8]
\coordinate (A) at (0,2);
\coordinate (B) at (-2,0);
\coordinate (C) at (4,0);
\coordinate (M) at (-1,1);
\coordinate (N) at (2,1);
\coordinate (O) at (1.5,0);
\coordinate (P) at (0.2,0);
\draw[thick] (A)--(B)--(C)--cycle;
\draw[thick] (A)--(O);
\draw[thick] (M)--(P);
\draw[thick] (N)--(O);
\node at (0.2,2) {$AS$};
\node at (-2.2,-0.2) {$BS$};
\node at (4.2,-0.2) {$CS$};
\node at (-1.2,1.2) {$MS$};
\node at (2.2,1.2) {$NS$};
\node at (1.5,-0.3) {$OS$};
\node at (0.2,-0.3) {$PS$};
\end{tikzpicture}
\end{document}
```

**Image Rendered From the Generated Tikz Code:**

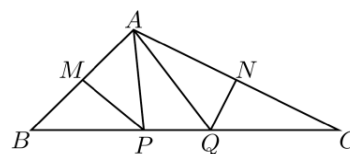

#### Problem Solving by InternVL3.5-38B W/O Tikz

**Prompt:**

<Image> Please answer this question based on the given image. Provide the correct answer, place the thinking process between <think> and </think>, and place the final answer between <answer> and </answer>. <Problem Text>

**Response:**

<think> To determine  $\angle PAQ$ : 1. A and B are symmetrical about MP, so MP bisects AB perpendicularly, hence  $\angle BAP = \angle ABP$ . 2. A and C are symmetrical about NQ, so NQ bisects AC perpendicularly, hence  $\angle CAP = \angle ACQ$ . 3. In  $\triangle ABC$ ,  $\angle B + \angle C = 180^\circ - 110^\circ = 70^\circ$ . 4. Since  $\angle BAP = \angle ABP$  and  $\angle CAP = \angle ACQ$ ,  $\angle BAP + \angle CAP = 140^\circ$  (as  $2(\angle BAP + \angle CAP) = 280^\circ$ ). 5.  $\angle PAQ = 360^\circ - 2(\angle BAP + \angle CAP) = 360^\circ - 280^\circ = 80^\circ$ . Thus,  $\angle PAQ$  is  $80^\circ$ .</think>  
<answer> $80^\circ$ </answer>

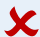

#### Problem Solving by InternVL3.5-38B With Tikz

**Prompt:**

<Image> <tikz><Generated TikZ Code></tikz> Please answer this question based on the given image and the corresponding Tikz code. Provide the correct answer, place the thinking process between <think> and </think>, and place the final answer between <answer> and </answer>. <Problem Text>

**Response:**

<think> To determine  $\angle PAQ$ : 1. A and B are symmetrical about MP, so MP bisects AB perpendicularly, hence  $\angle BAP = \angle ABP$ . 2. A and C are symmetrical about NQ, so NQ bisects AC perpendicularly, hence  $\angle QAC = \angle C$ . 3. In  $\triangle ABC$ ,  $\angle B + \angle C = 180^\circ - 110^\circ = 70^\circ$ . 4. Since  $\angle PAB = \angle B$  and  $\angle QAC = \angle C$ ,  $\angle PAB + \angle QAC = 70^\circ$ . 5.  $\angle PAQ = \angle BAC - (\angle PAB + \angle QAC) = 110^\circ - 70^\circ = 40^\circ$ . Thus,  $\angle PAQ$  is  $40^\circ$ .</think>  
<answer> $40^\circ$ </answer>

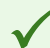

Figure S9. Example I: Angle calculation problem solving comparison with and without tikz code. Tikz clarifies geometric relationships to avoid perceptual errors in angle reasoning.

## Problem Solving Example II: Tikz Code Enables Precise Segment Length Calculation

**Question:** Find PT.

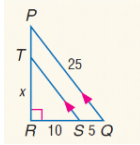

**GT Answer:** 20/3

### Tikz Generation by GeoTikzBridge-Base

**Prompt:**

Please generate the corresponding TikZ code that accurately represents the visual elements in the image. TikZ is a powerful tool for creating vector graphics within LaTeX documents. Your generated code should be precise, well-structured, and should recreate the image as faithfully as possible.

**Response:**

```
\documentclass[tikz,border=3.14mm]{standalone}
\usepackage[UTF8]{ctex}
\usetikzlibrary{calc,angles,quotes,arrows.meta}
\begin{document}
\begin{tikzpicture}[font=\sffamily,>=Stealth]
\path (0,0) coordinate (R) node[below]{$R$}
(2,2) coordinate (Q) node[below]{$Q$}
(0,2.5) coordinate (P) node[above]{$P$}
(1.3,0) coordinate (S) node[below]{$S$}
(0,1.5) coordinate (T) node[left]{$T$};
\draw[thick,cyan!70!blue] (R) -- (Q) -- (P) -- cycle;
\draw[thick,cyan!70!blue] (R) -- (S) -- (T) -- cycle;
\draw[magenta,thick] (R) ++ (0,0.3) coordinate (R') -- ++ (0.3,0) coordinate (R'') -- ++ (0,-0.3);
\draw[magenta,thick,-{Latex[length=3mm]}] (S) -- ($(S)!0.5!(T)$);
\draw[magenta,thick,-{Latex[length=3mm]}] (Q) -- ($(Q)!0.5!(P)$);
\path (T) -- (R) node[midway,left]{$x$}
(Q) -- (P) node[midway,above right]{$25$}
(R) -- (S) node[midway,below]{$10$}
(Q) -- (S) node[midway,below]{$5$};
\end{tikzpicture}
\end{document}
```

**Image Rendered From the Generated Tikz Code:**

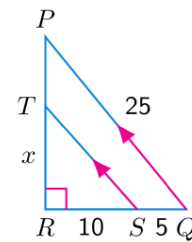

### Problem Solving by InternVL3.5-38B W/O Tikz

**Prompt:**

<Image> Please answer this question based on the given image. Provide the correct answer, place the thinking process between <think> and </think>, and place the final answer between <answer> and </answer>. <Problem Text>

**Response:**

<think>To find PT, use similar triangles: triangles PRT and PRQ are similar as they share angle P and both have a right angle. Given  $RQ = RS + SQ = 10 + 5 = 15$  and  $PQ = 25$ , use the Pythagorean theorem in triangle PRQ:  $PR^2 + 15^2 = 25^2 \rightarrow PR^2 + 225 = 625 \rightarrow PR^2 = 400 \rightarrow PR = 20$ . Use the similarity ratio:  $20/25 = RT/15 \rightarrow 4/5 = RT/15 \rightarrow RT = (4 \times 15)/5 = 12$ . Find PT:  $PT = \sqrt{(20^2 + 12^2)} = \sqrt{(400 + 144)} = \sqrt{544} = 4\sqrt{34}$ . So,  $PT = 4\sqrt{34}$ .</think>

<answer> $4\sqrt{34}$ </answer>

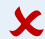

### Problem Solving by InternVL3.5-38B With Tikz

**Prompt:**

<Image> <tikz><Generated TikZ Code></tikz> Please answer this question based on the given image and the corresponding Tikz code. Provide the correct answer, place the thinking process between <think> and </think>, and place the final answer between <answer> and </answer>. <Problem Text>

**Response:**

<think>To find PT, use similar triangles: triangles PRT and PRQ are similar as they share angle P and both have a right angle. Given  $RS = 10$ ,  $SQ = 5$ , so  $RQ = 10 + 5 = 15$  and  $PQ = 25$ . Use the Pythagorean theorem in triangle PRQ:  $PR^2 + 15^2 = 25^2 \rightarrow PR^2 + 225 = 625 \rightarrow PR^2 = 400 \rightarrow PR = 20$ . Use the similarity ratio:  $TR/20 = 10/15 \rightarrow TR/20 = 2/3 \rightarrow TR = 40/3$ . Find PT:  $PT = PR - TR = 20 - 40/3 = 20/3$ . So,  $PT = 20/3$ .</think>

<answer> $20/3$ </answer>

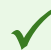

Figure S10. Example II: Segment length problem solving comparison with and without tikz code. Tikz facilitates accurate proportion and theorem application for length reasoning.

**Problem Solving Example III (1/2): Auxiliary Line & Tikz Generation (Circle Center-Tangent Connection)**

**Question:** The degree measures of minor arc  $\widehat{AC}$  and major arc  $\widehat{ADC}$  are  $x$  and  $y$  respectively. If  $\angle ABC = 70^\circ$ , find  $x$ .

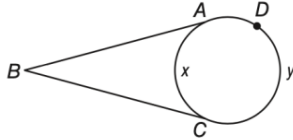

**GT Answer:** 110

**Auxiliary Line Instruction Generation by InternVL3.5-38B**

**Prompt:**

<Image> Please provide the most appropriate instruction for adding auxiliary lines to solve the problem based on the given problem and the provided geometric image. The instruction should be simple and clear, such as "Connect AC", "Draw a perpendicular line from point B to AC", "Draw a line through point B parallel to AC", etc. If no auxiliary line is needed, output "None". Do not include the thinking process. Additionally, place the instruction for adding auxiliary lines between <instruction> and </instruction>. <Problem Text>

**Response:**

<instruction>Connect the center O to points A and C.</instruction>

**Tikz Generation by GeoTikzBridge-Instruct**

**Prompt:**

Modify the given image based on the following requirements: Connect the center O to points A and C. Please generate the corresponding TikZ code that accurately represents the visual elements in the modified image. TikZ is a powerful tool for creating vector graphics within LaTeX documents. Your generated code should be precise, well-structured, and should recreate the image as faithfully as possible.

**Response:**

```
\documentclass[tikz,border=3.14mm]{standalone}
\usepackage[UTF8]{ctex}
\usetikzlibrary{calc}
\begin{document}
\begin{tikzpicture}[font=\sffamily,line width=1pt]
\coordinate (B) at (0,0);
\coordinate (O) at (3.15,0);
\def\radius{1}
\coordinate (A) at (2.95, 0.98);
\coordinate (C) at (2.95, -0.98);
\coordinate (D) at (3.65, {sqrt(3)/2});
\draw (O) circle[radius=\radius];
\draw (O) -- (A); % Connect OA
\draw (O) -- (C); % Connect OC
\node[right] at (O) {$O$}; % annotate the center O
\draw (B) -- (A) node[above,pos=1.1]{$A$};
\draw (B) -- (C) node[below,pos=1.1]{$C$};
\fill (D) circle[radius=2.5pt] node[above]{$D$};
\node[left] at (B) {$B$};
\path (O) -- (A) node[pos=0.5,left]{$x$};
\path (O) -- (D) node[pos=0.5,right]{$y$};
\end{tikzpicture}
\end{document}
```

**Image Rendered From the Generated Tikz Code:**

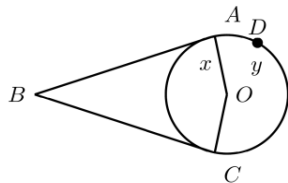

Figure S11. Example III (1/2): Auxiliary line instruction (connecting circle center and tangent points) and tikz code generation. The line manifests radius-tangent perpendicularity.

**Problem Solving Example III (2/2): Auxiliary Line Assistant Reasoning (Circle Center-Tangent Connection: Dual Formats Effective)**

**Question:** The degree measures of minor arc  $\widehat{AC}$  and major arc  $\widehat{ADC}$  are  $x$  and  $y$  respectively. If  $\angle ABC = 70^\circ$ , find  $x$ .

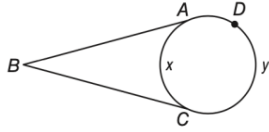

**GT Answer:** 110

**Problem Solving by InternVL3.5-38B W/O Auxiliary Lines**

**Prompt:**

<Image> Please answer this question based on the given image. Provide the correct answer, place the thinking process between <think> and </think>, and place the final answer between <answer> and </answer>.&br/><Problem Text>

**Response:**

<think>To solve for  $x$ , use the **Inscribed Angle Theorem: an inscribed angle's measure is half its intercepted arc's measure.**  $\angle ABC$  is an inscribed angle intercepting arc  $AC$  (measure  $x$ ). Given  $\angle ABC = 70^\circ$ , so  $70^\circ = 1/2 x$ . Solve:  $x = 70^\circ \times 2 = 140^\circ$ . Thus,  $x = 140$ .</think>

<answer>140</answer> ✗

**Problem Solving by InternVL3.5-38B With Auxiliary Line Image**

**Prompt:**

<Image><Rendered Image> Please answer this question based on the given image and the image with auxiliary lines added. Provide the correct answer, place the thinking process between <think> and </think>, and place the final answer between <answer> and </answer>. <Problem Text>

**Response:**

<think>To solve for  $x$ , use tangent properties and central angle relationships: By tangent property,  $OA \perp BA$  and  $OC \perp BC$ , so  $\angle OAB = \angle OCB = 90^\circ$ . In quadrilateral  $OABC$ , interior angles sum to  $360^\circ$ . Given  $\angle ABC = 70^\circ$ , so  $90^\circ + 90^\circ + 70^\circ + \angle AOC = 360^\circ$ , thus  $\angle AOC = 110^\circ$ . The central angle  $\angle AOC$  corresponds to minor arc  $AC$  (measure  $x$ ), so  $x = 110^\circ$ . Thus,  $x = 110$ .</think>

<answer>110</answer> ✓

**Problem Solving by InternVL3.5-38B With Both Auxiliary Line Image And Tikz**

**Prompt:**

<Image><Rendered Image> <tikz><Generated TikZ Code></tikz> Please answer this question based on the given image, the image with auxiliary lines added, and the corresponding Tikz code. Provide the correct answer, place the thinking process between <think> and </think>, and place the final answer between <answer> and </answer>. <Problem Text>

**Response:**

<think>To solve for  $x$ , use tangent properties and central angle relationships: By the tangent property,  $OA \perp BA$  and  $OC \perp BC$ , so  $\angle OAB = \angle OCB = 90^\circ$ . In quadrilateral  $OABC$ , the sum of interior angles is  $360^\circ$ . Given  $\angle ABC = 70^\circ$ , we have  $90^\circ + 90^\circ + 70^\circ + \angle AOC = 360^\circ$ , so  $\angle AOC = 110^\circ$ . The central angle  $\angle AOC$  corresponds to minor arc  $AC$  (measure  $x$ ), so  $x = 110^\circ$ . Thus,  $x = 110$ .</think>

<answer>110</answer> ✓

Figure S12. Example III (2/2): Problem solving comparison under different forms, with incorrect analysis/answers highlighted in red and key correct ones in green. Both auxiliary line image and its tikz combination enable correct reasoning via explicit perpendicularity recognition.

### Problem Solving Example IV (1/2): Auxiliary Line & Tikz Generation (Key Right Triangle Construction)

**Question:** In the figure, in rhombus ABCD, M and N are the midpoints of BC and CD respectively. NP is perpendicular to AB at point P, and MP is connected. If  $\angle DAB = 40^\circ$ , then  $\angle MPB = (\ ) ?$

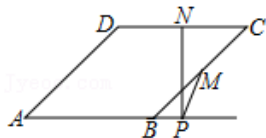

**GT Answer:**  $110^\circ$

#### Auxiliary Line Instruction Generation by InternVL3.5-38B

**Prompt:**

<Image> Please provide the most appropriate instruction for adding auxiliary lines to solve the problem based on the given problem and the provided geometric image. The instruction should be simple and clear, such as "Connect AC", "Draw a perpendicular line from point B to AC", "Draw a line through point B parallel to AC", etc. If no auxiliary line is needed, output "None". Do not include the thinking process. Additionally, place the instruction for adding auxiliary lines between <instruction> and </instruction>. <Problem Text>

**Response:**

<instruction>Connect NM and extend to intersect AP at point Q.</instruction>

#### Tikz Generation by GeoTikzBridge-Instruct

**Prompt:**

Modify the given image based on the following requirements: **Connect NM and extend to intersect AP at point Q.** Please generate the corresponding TikZ code that accurately represents the visual elements in the modified image. TikZ is a powerful tool for creating vector graphics within LaTeX documents. Your generated code should be precise, well-structured, and should recreate the image as faithfully as possible.

**Response:**

```

\documentclass{standalone}
\usepackage[UTF8]{ctex}
\usepackage{tikz}
\usetikzlibrary{calc}
\begin{document}
\begin{tikzpicture}
\coordinate (A) at (0,0);
\coordinate (B) at (2,0);
\coordinate (C) at (3.5,1.5);
\coordinate (D) at (1.5,1.5);
\coordinate (M) at ($(B)!0.5!(C)$);
\coordinate (N) at ($(D)!0.5!(C)$);
\coordinate (P) at (2.5,0);
\draw[thick] (A) -- (B) -- (C) -- (D) -- cycle;
\draw[thick] (M) -- (P);
\draw[thick] (N) -- (P);
% Connect NM and extend to intersect AP at point Q.
\draw[thick] (N) -- (M) --(intersection of N--M and A--P);
\coordinate (Q) node[below right] at (Q) {$Q$};
\draw[thick] (A) -- ($(A)!1.5!(B)$);
\node[below] at (B) {$B$};
\node[left] at (A) {$A$};
\node[right] at (C) {$C$};
\node[left] at (D) {$D$};
\node[below] at (P) {$P$};
\node[right] at (M) {$M$};
\node[above] at (N) {$N$};
\end{tikzpicture}
\end{document}

```

**Image Rendered From the Generated Tikz Code:**

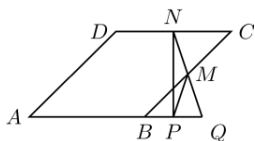

Figure S13. Example IV (1/2): Auxiliary line instruction (extending midpoint connection) and tikz code generation. The line constructs a key right triangle by forming intersection Q.

**Problem Solving Example IV (2/2): Auxiliary Line Assistant Reasoning (Key Right Triangle Construction: Tikz-Augmented Combination Effective)**

**Question:** In the figure, in rhombus ABCD, M and N are the midpoints of BC and CD respectively. NP is perpendicular to AB at point P, and MP is connected. If  $\angle DAB = 40^\circ$ , then  $\angle MPB = (\quad) ?$

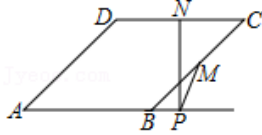

**GT Answer:**  $110^\circ$

**Problem Solving by InternVL3.5-38B W/O Auxiliary Lines**

**Prompt:**

<Image> Please answer this question based on the given image. Provide the correct answer, place the thinking process between <think> and </think>, and place the final answer between <answer> and </answer>. <Problem Text>

**Response:**

<think>To find  $\angle MPB$  in rhombus ABCD: 1. ABCD is a rhombus,  $\angle DAB = 40^\circ$ , so  $\angle DBC = \angle DBA = 0.5 \times \angle DAB = 20^\circ$ ,  $AB \parallel CD$ ,  $CD = CB$ . 2. N is the midpoint of CD, so  $CN = DN$ . Thus  $BN = CN = DN$ ,  $\angle NBD = \angle NDB = 20^\circ$ ,  $\angle NBP = 40^\circ$ . 3.  $NP \perp AB$ , so  $\angle NPB = 90^\circ$ , thus  $\angle BNP = 50^\circ$ . 4. M is the midpoint of BC,  $BN = CN$ , so  $MN \parallel BD$ . 5. By  $MN \parallel BD$ ,  $\angle MPB = \angle DBA = 20^\circ$ . Thus,  $\angle MPB = 20^\circ$ .</think>  
<answer>20</answer> ✗

**Problem Solving by InternVL3.5-38B With Auxiliary Line Image**

**Prompt:**

<Image><Rendered Image> Please answer this question based on the given image and the image with auxiliary lines added. Provide the correct answer, place the thinking process between <think> and </think>, and place the final answer between <answer> and </answer>. <Problem Text>

**Response:**

<think>To find  $\angle MPB$  in rhombus ABCD: 1. Adjacent angles in a rhombus are supplementary. Given  $\angle DAB = 40^\circ$ ,  $\angle ABC = 140^\circ$  and  $\angle C = 40^\circ$ . 2. M, N are midpoints of BC, CD, so  $CM = CN$  ( $BC = CD$  in rhombus).  $\triangle CMN$  is isosceles, so  $\angle CNM = 70^\circ$ . 3.  $AB \parallel CD$ . By parallel line property,  $\angle Q = \angle CNM = 70^\circ$ . 4.  $NP \perp AB$ , so  $\triangle NPQ$  is right-angled. M is the midpoint of PQ, by hypotenuse median theorem,  $MP = MQ$ . 5.  $\triangle MPQ$  is isosceles ( $\angle MPQ = \angle Q = 70^\circ$ ), so  $\angle MPB = \angle MPQ = 70^\circ$ . Thus,  $\angle MPB = 70^\circ$ .</think>  
<answer>70</answer> ✗

**Problem Solving by InternVL3.5-38B With Both Auxiliary Line Image And Tikz**

**Prompt:**

<Image><Rendered Image> <tikz><Generated TikZ Code></tikz> Please answer this question based on the given image, the image with auxiliary lines added, and the corresponding Tikz code. Provide the correct answer, place the thinking process between <think> and </think>, and place the final answer between <answer> and </answer>. <Problem Text>

**Response:**

<think>To find  $\angle MPB$  in rhombus ABCD: 1. Adjacent angles in a rhombus are supplementary. Given  $\angle DAB = 40^\circ$ ,  $\angle ABC = 140^\circ$  and  $\angle C = 40^\circ$ . 2. M, N are midpoints of BC, CD, so  $CM = CN$  ( $BC = CD$  in rhombus).  $\triangle CMN$  is isosceles, so  $\angle CMN = \angle CNM = 70^\circ$ . 3.  $AB \parallel CD$ , so  $\angle Q = \angle CNM = 70^\circ$ . 4.  $NP \perp AB$ , so  $\triangle NPQ$  is right-angled. By hypotenuse median theorem,  $MP = MQ$ . 5.  $\triangle MPQ$  is isosceles ( $\angle MPQ = \angle Q = 70^\circ$ ), so  $\angle MPB = 180^\circ - 70^\circ = 110^\circ$ . Thus,  $\angle MPB = 110^\circ$ .</think>  
<answer>110</answer> ✓

Figure S14. Example IV (2/2): Problem solving comparison under different forms, with incorrect analysis/answers highlighted in red and key correct ones in green. The auxiliary line image provides a visual foundation for constructing the right triangle  $\triangle NPQ$ . Its combination with tikz code achieves correct reasoning, since tikz explicitly encodes the spatial structure of the constructed right triangle.
